# Supplementary material for: A novel coumarin-based colorimetric and fluorescent probe for detecting increasing concentrations of Hg2+in vitro and in vivo
Source: Royal Society of Chemistry journal article supplement (doi:10.1039/d1ra01408k), 2021-01-01
Supplement: d1ra01408k1.pdf [file d1ra01408k1.pdf]

**A Novel coumarin-based colorimetric and fluorescent probe for detecting increasing concentrations of Hg<sup>2+</sup> *in vitro* and *in vivo***

Li Huang,<sup>a</sup> Wenlong Sheng<sup>b</sup>, Lizhen Wang,<sup>b</sup> Xia Meng,<sup>a</sup> Hongdong Duan<sup>a,\*</sup> Liqun Chi<sup>c,\*</sup>

<sup>a</sup> School of Chemistry and Chemical Engineering, Qilu University of Technology (Shandong Academy of Sciences), Jinan 250353, PR China

<sup>b</sup> Biology Institute, Qilu University of Technology (Shandong Academy of Sciences), Jinan 250014, Shandong Province, China

<sup>c</sup> Department of Pharmacy, Haidian Maternal & Child Health Hospital of Beijing, Beijing, 100080, PR China

\*Corresponding author, E-mail: hdduan67@163.com ; chiliqun@sohu.com

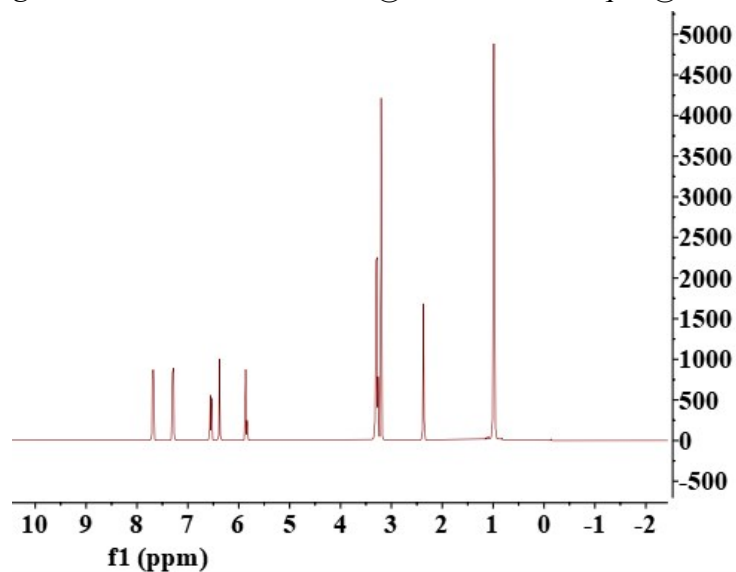

**Figure S1.** <sup>1</sup>H NMR of compound 1

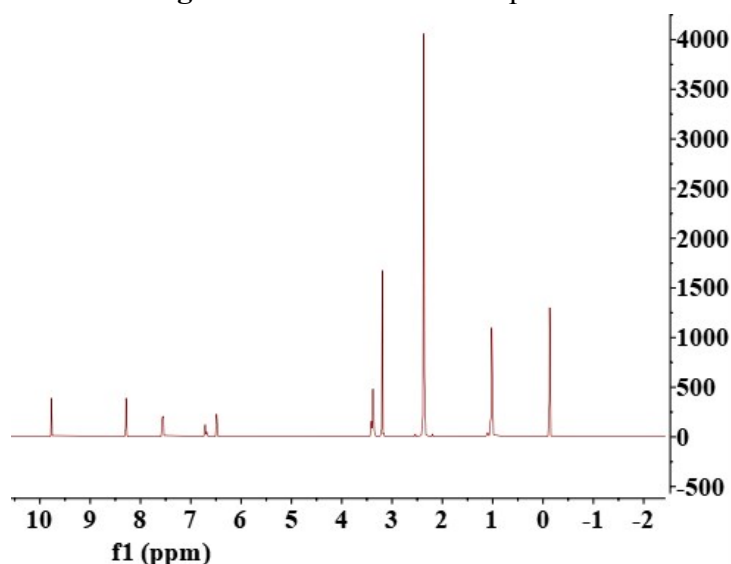

**Figure S2.** <sup>1</sup>H NMR of compound 2

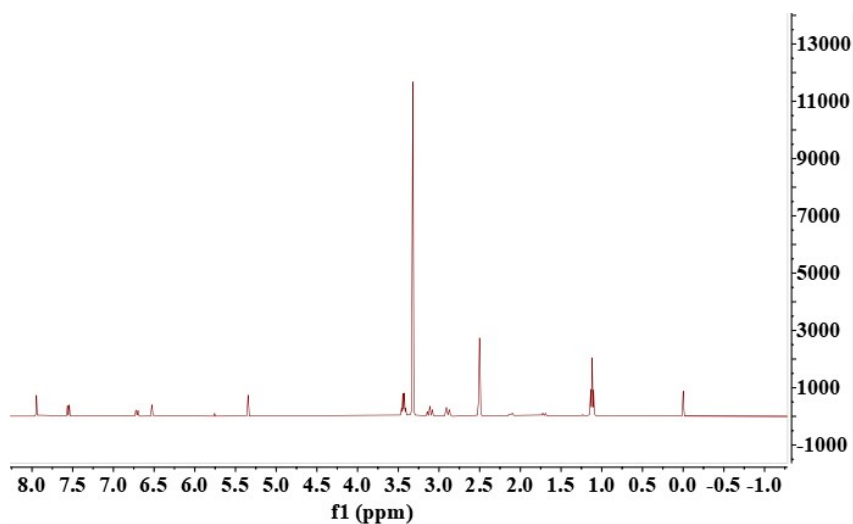

**Figure S3.**  $^1\text{H}$  NMR of probe CNS

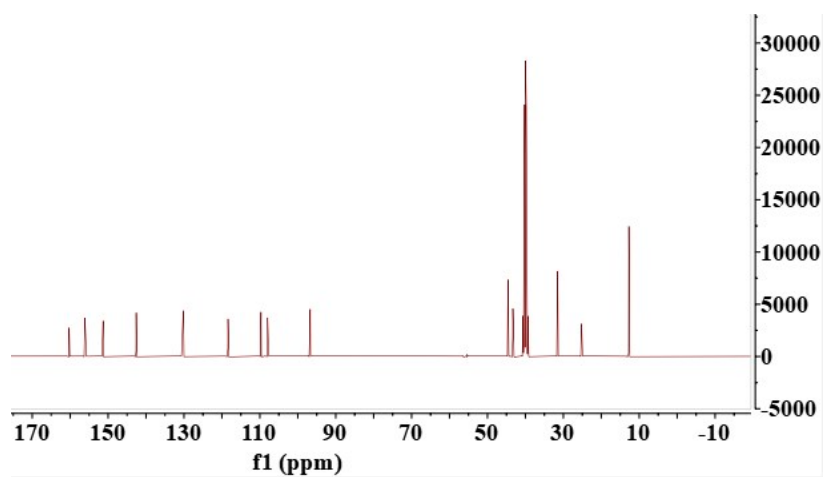

**Figure S4.**  $^{13}\text{C}$  NMR of probe CNS

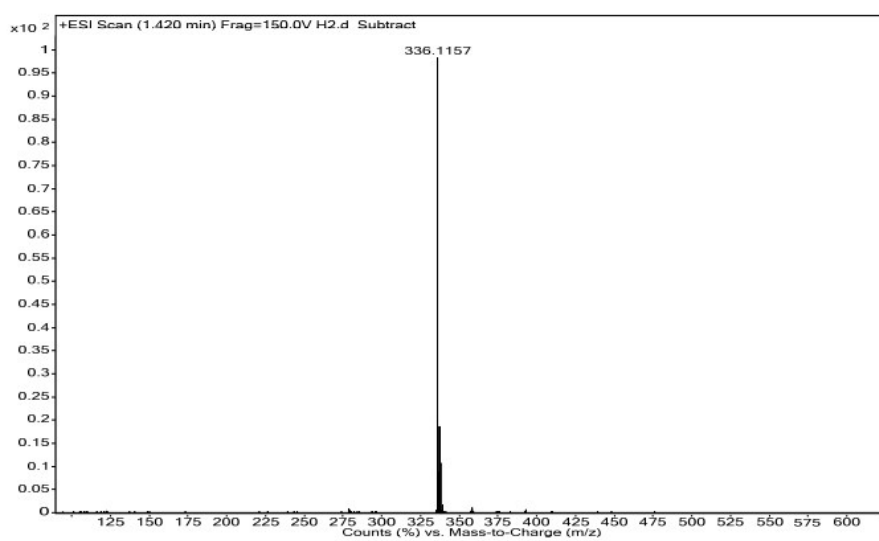

**Figure S5.** HRMS of probe CNS

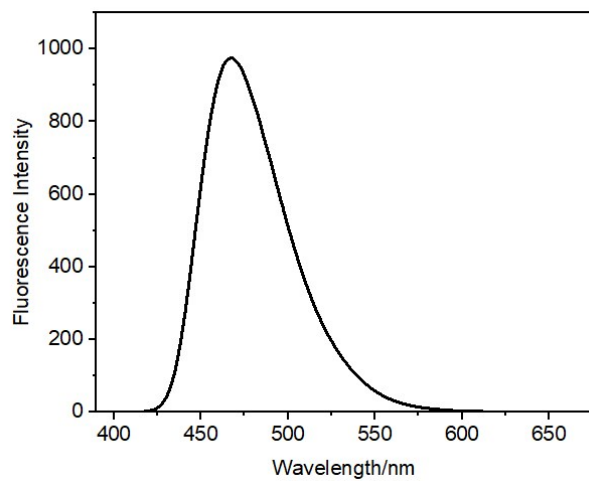

**Figure S6.** The emission wavelength of CNS. Excitation wavelength =390nm.
